# Supplementary material
Source: PubMed Central journal article supplement (PMC7861501)
Supplement: str-52-396-s001.pdf [file str-52-396-s001.pdf]

## **SUPPLEMENTAL MATERIAL**

**Acceptable Patients**

Patients are labelled as 'acceptable' for use in research by a process that identifies and excludes patients with non-continuous follow up or patients with poor data recording that raises suspicion as to the validity of the that patients record. Patient data is checked, for the following issues:

- An empty or invalid first registration date
- An empty or invalid current registration date
- Absence of a record for a year of birth
- A first registration date prior to their birth year
- A current registration date prior to their birth year
- A transferred-out reason with no transferred-out date
- A transferred-out date with no transferred-out reason
- A transferred-out date prior to their first registration date
- A transferred-out date prior to their current registration date
- A current registration date prior to their first registration date
- A gender other than Female/Male/Indeterminate
- An age of greater than 115 at end of follow up
- Recorded health care episodes in years prior to birth year
- All recorded health care episodes have empty or invalid event dates
- Registration status of temporary patients

If any of these conditions are true, the patient is labelled unacceptable and is not recommended for use in research.

**UTS date**

The overall quality of data in practices is mediated by use of an 'up to standard' (UTS) date, which is deemed as the date at which data in the practice is considered to have continuous high-quality data fit for use in research. This is mediated by an analysis on the total data in the practice, which is refreshed every time a new collection for a practice is processed into the database. It is based on two central concepts: assurance of continuity in data recording (gap analysis), and avoidance of use of data for which transferred out and dead patients have been removed (death recording).

The UTS date is set to the latest of these dates for each practice. The CPRD recommend that analyses are performed on data following the practice UTS date.

## Supplemental Figure I Study Flow Diagram

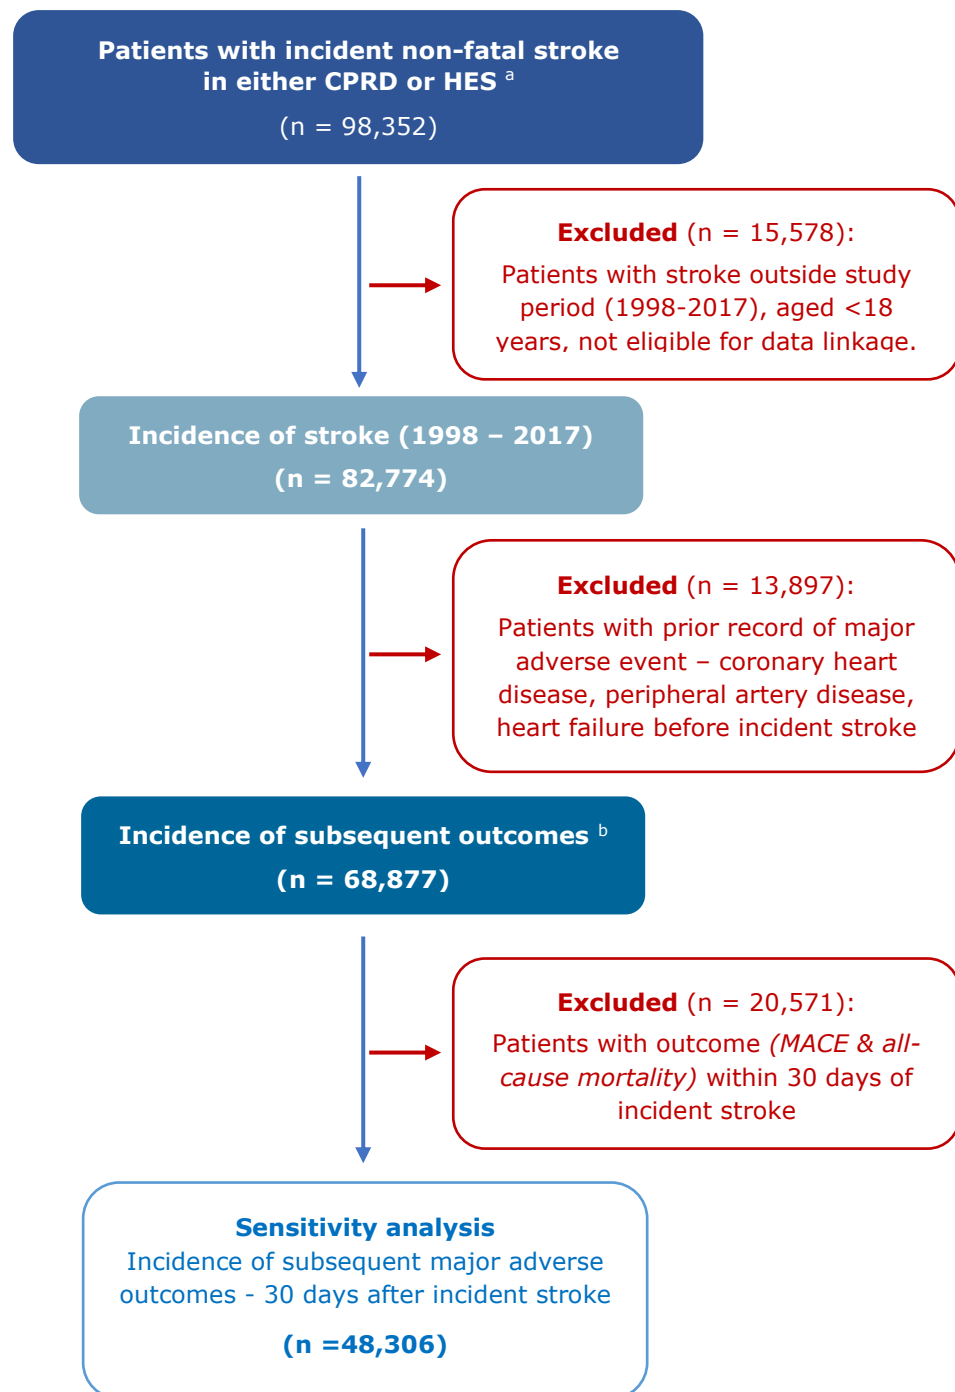

- Incident non-fatal stroke recorded between 1<sup>st</sup> January 1998 and 31<sup>st</sup> December 2017 in patients, 18 years and over with at least 12 months of registration with the practice. Practices contributing up-to-standard data and patient primary care record has linkage to HES.
- Censored at earliest of outcome of interest, death, transfer out of practice or data end date (last data collection).

**Outcome of interest:** Major adverse cardiovascular disease (defined as either a diagnosis of coronary heart disease, recurrent stroke, peripheral vascular disease, heart failure and cardiovascular-related death) and all-cause mortality.

**Supplemental Figure II**

**Distribution of subsequent major adverse outcomes by sex and 5-year age group for patient with subsequent outcome after 30 days of incident stroke (n=48,306)**

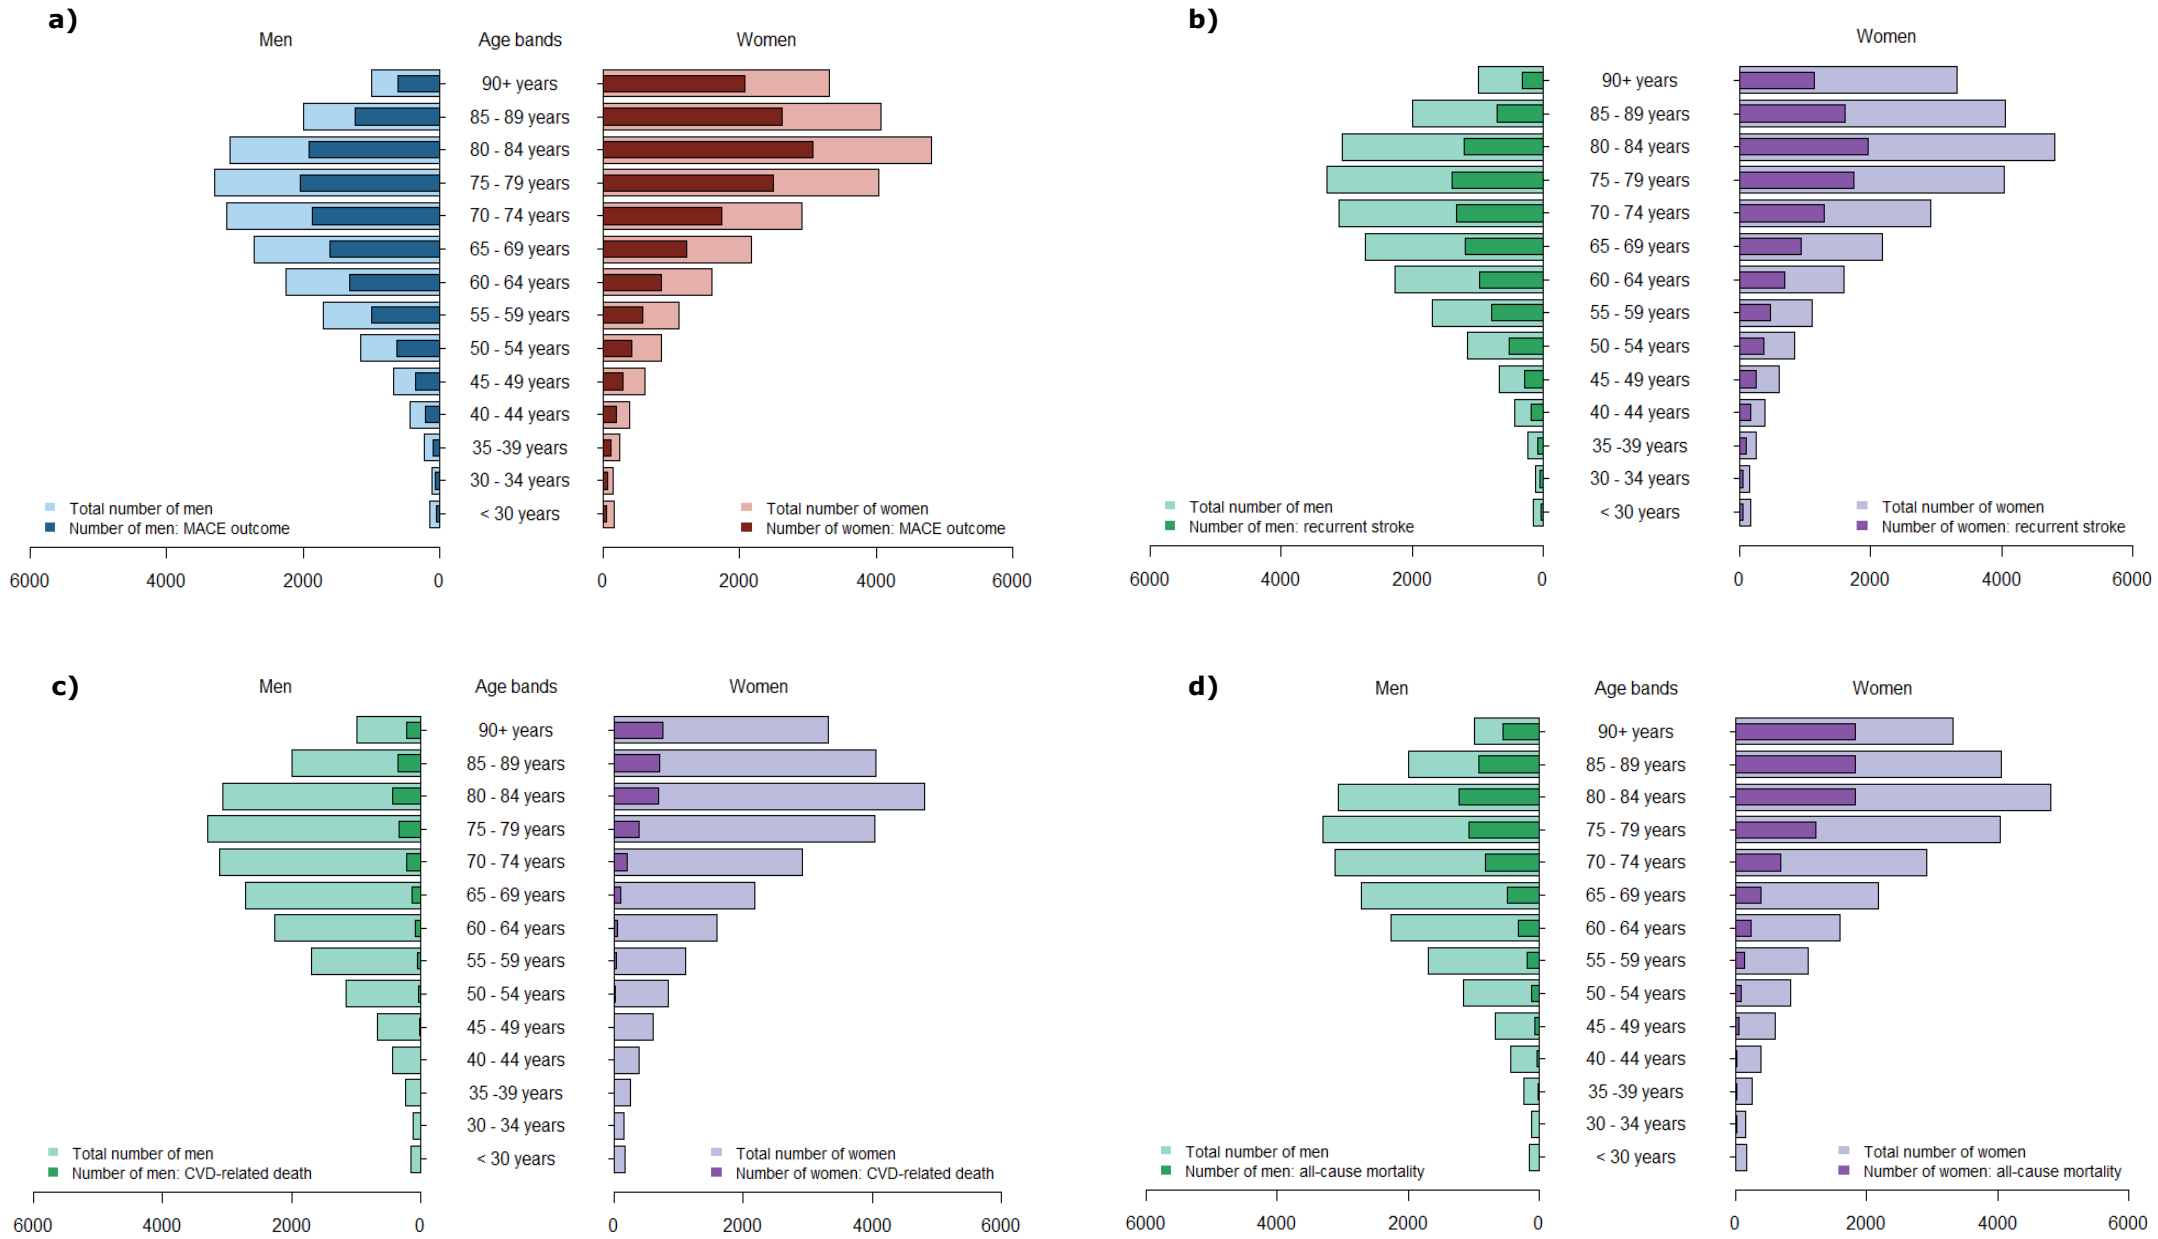

(a) Major adverse cardiovascular events (n=28,750), (b) Recurrent stroke (n=19,896), (c) Cardiovascular-related mortality (n=4,797), (d) All-cause mortality (n=14,137)

**Supplemental Figure III**

**Incidence of subsequent major adverse outcomes presented by sex and 5-year age groups for patient with subsequent major adverse event after 30 days of index stroke (n=48,306)**

**a. Major adverse cardiovascular events**

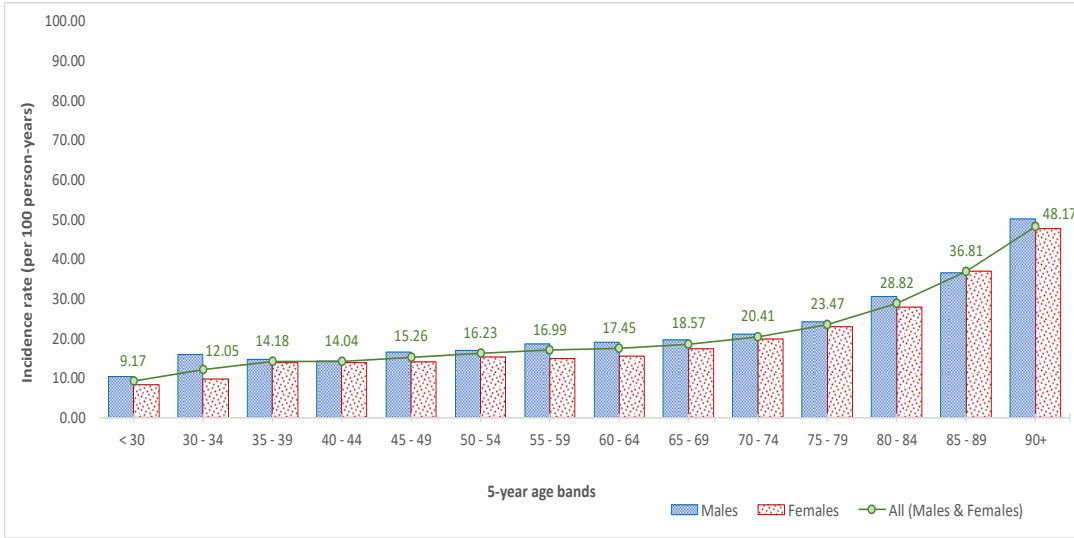

**b. Recurrent stroke**

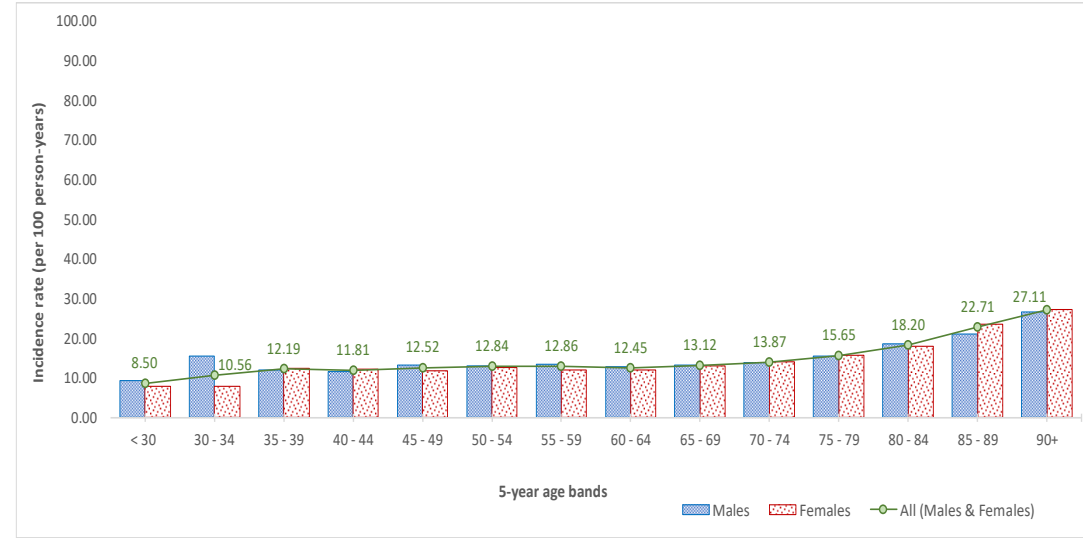

**c. Cardiovascular-related mortality**

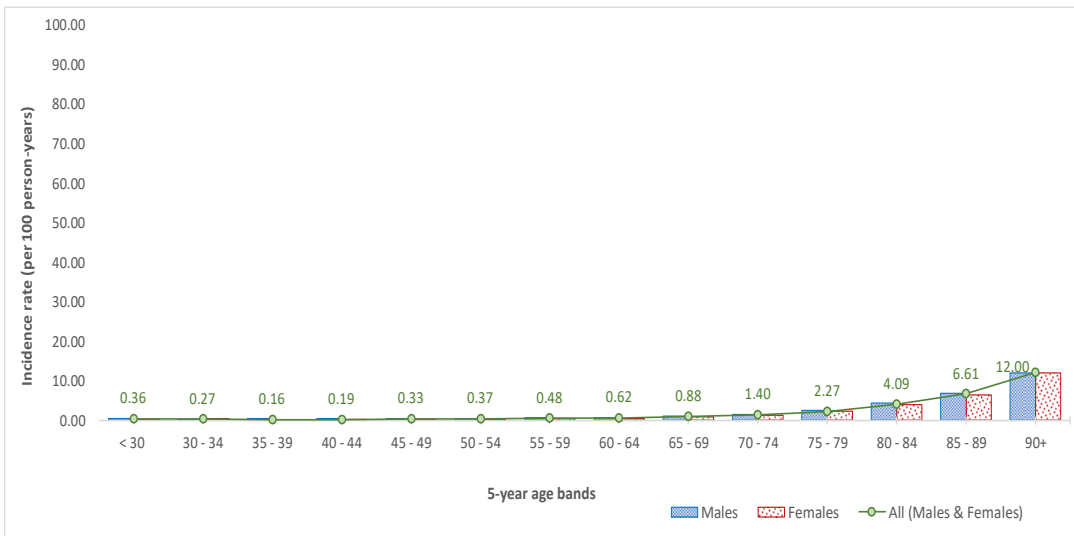

**d. All-cause mortality**

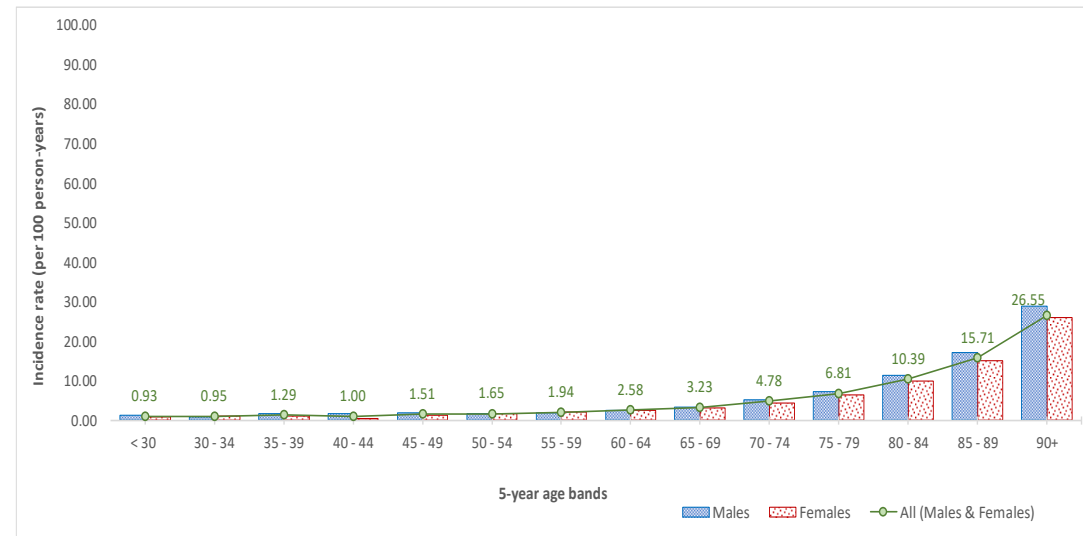

Supplemental Table I

## ICD-10 and Read code lists for stroke

| Stroke subtype                       | ICD-10 codes                                                         | CPRD Read codes                                                                                                                                                                                                                                                                                                           |
|--------------------------------------|----------------------------------------------------------------------|---------------------------------------------------------------------------------------------------------------------------------------------------------------------------------------------------------------------------------------------------------------------------------------------------------------------------|
| Haemorrhagic stroke                  | I61, I62.9, I69.1, I69.2                                             | 662o.00, 7004300, G610.00, G611.00, G612.00, G613.00, G614.00, G615.00, G616.00, G617.00, G618.00, G619.00, G61..00, G61..11, G61..12, G61X000, G61X100, G61X.00, G61z.00, G681.00, G682.00, Gyu6200, Gyu6F00                                                                                                             |
| Ischaemic stroke                     | I63.0, I63.4, I63.9, I63.1, I63.5, I69.3, I63.2, I63.6, I63.3, I63.8 | G63..11, G63y000, G63y100, G640000, G640.00, G641000, G641.00, G641.11, G64..00, G64..11, G64..12, G64..13, G64z000, G64z100, G64z111, G64z200, G64z300, G64z400, G64z.00, G64z.11, G64z.12, G683.00, G6W..00, G6X..00, Gyu6300, Gyu6400, Gyu6G00                                                                         |
| Stroke not-otherwise-specified (NOS) | I64, I69.4, I69.8, G46.3, G46.7, G46.6, G46.5, G46.4, G46.8          | 14A7.00, 14A7.11, 14A7.12, 14AK.00, 1M4..00, 661M700, 661N700, 662e.00, 662e.11, 662M100, 662M200, 662M.00, 7P24200, 8HHM.00, 8IEC.00, 9h21.00, 9h22.00, 9h2..00, Fyu5600, G663.00, G664.00, G665.00, G666.00, G667.00, G668.00, G66..00, G66..11, G66..12, G66..13, G68X.00, Gyu6C00, L440.11, L440.12, ZV12511, ZV12512 |

Supplemental Table II

## Incidence of stroke presented by year and sex (1998 – 2017)

| Age group (years) | Stroke events |       | 100,000 person-years at risk |       | Incidence rate per 100,000 person-years (95% CI) |                          |                          |
|-------------------|---------------|-------|------------------------------|-------|--------------------------------------------------|--------------------------|--------------------------|
|                   | Men           | Women | Men                          | Women | All                                              | Men                      | Women                    |
| 1998              | 833           | 1044  | 7.19                         | 7.58  | 127.05 (121.43 – 132.93)                         | 115.82 (108.22 – 123.96) | 137.71 (129.61 – 146.32) |
| 1999              | 975           | 1264  | 8.21                         | 8.62  | 132.98 (127.52 – 138.60)                         | 118.68 (111.46 – 126.37) | 146.60 (138.73 – 154.91) |
| 2000              | 1249          | 1472  | 10.04                        | 10.49 | 132.53 (127.64 – 137.60)                         | 124.40 (117.69 – 131.50) | 140.30 (133.31 – 147.65) |
| 2001              | 1564          | 1942  | 12.41                        | 12.93 | 138.30 (133.80 – 142.96)                         | 126.00 (119.91 – 132.40) | 150.11 (143.58 – 155.64) |
| 2002              | 1832          | 2171  | 14.01                        | 14.55 | 140.15 (135.88 – 144.56)                         | 130.73 (124.88 – 136.86) | 149.23 (143.08 – 155.71) |
| 2003              | 2051          | 2461  | 16.13                        | 16.70 | 137.47 (133.51 – 141.54)                         | 127.19 (121.80 – 132.81) | 147.40 (141.69 – 153.34) |
| 2004              | 2732          | 3510  | 17.90                        | 18.45 | 171.72 (167.51 – 176.03)                         | 152.63 (147.02 – 158.47) | 190.23 (184.04 – 196.63) |
| 2005              | 2598          | 3456  | 19.39                        | 19.97 | 153.81 (149.98 – 157.73)                         | 133.95 (128.90 – 139.21) | 173.09 (167.42 – 178.96) |
| 2006              | 2568          | 3127  | 19.94                        | 20.50 | 140.84 (137.23 – 144.54)                         | 128.79 (123.90 – 133.86) | 152.56 (147.31 – 158.00) |
| 2007              | 2415          | 2823  | 20.18                        | 20.68 | 128.19 (124.77 – 131.71)                         | 119.67 (114.99 – 124.54) | 136.51 (131.56 – 141.64) |
| 2008              | 2354          | 2773  | 20.46                        | 20.94 | 123.85 (120.51 – 127.29)                         | 115.07 (110.51 – 119.81) | 132.43 (127.59 – 137.45) |
| 2009              | 2493          | 2884  | 20.56                        | 21.05 | 129.20 (125.79 – 132.70)                         | 121.23 (116.56 – 126.08) | 136.98 (132.07 – 142.07) |
| 2010              | 2515          | 2793  | 20.39                        | 20.88 | 128.62 (125.21 – 132.13)                         | 123.36 (118.64 – 128.28) | 133.75 (128.88 – 138.80) |
| 2011              | 2430          | 2801  | 19.96                        | 20.50 | 129.27 (125.81 – 132.82)                         | 121.71 (116.97 – 126.65) | 136.62 (131.65 – 141.77) |
| 2012              | 2331          | 2445  | 19.81                        | 20.37 | 118.86 (115.54 – 122.28)                         | 117.65 (112.97 – 122.53) | 120.04 (115.38 – 124.90) |
| 2013              | 2215          | 2422  | 18.98                        | 19.56 | 120.33 (116.91 – 123.84)                         | 116.72 (111.96 – 121.68) | 123.82 (118.99 – 128.85) |
| 2014              | 1897          | 2021  | 17.54                        | 18.05 | 110.09 (106.69 – 113.59)                         | 108.18 (103.42 – 113.16) | 111.94 (107.16 – 116.93) |
| 2015              | 1394          | 1495  | 15.55                        | 16.01 | 91.52 (88.24 – 94.92)                            | 89.62 (85.04 – 94.46)    | 93.36 (88.74 – 98.21)    |
| 2016              | 1023          | 1020  | 13.09                        | 13.46 | 76.96 (73.70 – 80.37)                            | 78.18 (73.53 – 83.12)    | 75.78 (71.27 – 80.58)    |
| 2017              | 691           | 690   | 11.64                        | 11.93 | 58.58 (55.58 – 61.76)                            | 59.37 (55.10 – 63.97)    | 57.82 (53.66 – 62.30)    |

Supplemental Table III

## Stroke incidence presented by age group and sex (1998 – 2017)

| Age group (years) | Stroke events |        | 100,000 person-years at risk |        | Incidence rate per 100,000 person-years<br>(95% CI) |                          |                            |
|-------------------|---------------|--------|------------------------------|--------|-----------------------------------------------------|--------------------------|----------------------------|
|                   | Men           | Women  | Men                          | Women  | All                                                 | Men                      | Women                      |
| < 20              | 148           | 115    | 38.67                        | 30.29  | 3.81 (3.38 – 4.30)                                  | 3.83 (3.26 – 4.50)       | 3.80 (3.16 – 4.56)         |
| 20 – 24           | 126           | 158    | 26.84                        | 28.30  | 5.15 (4.58 – 5.79)                                  | 4.69 (3.94 – 5.59)       | 5.58 (4.78 – 6.52)         |
| 25 – 29           | 314           | 345    | 34.16                        | 36.62  | 9.31 (8.63 – 10.05)                                 | 9.19 (8.23 – 10.27)      | 9.42 (8.48 – 10.47)        |
| 30 – 34           | 637           | 556    | 40.52                        | 41.44  | 14.55 (13.75 – 15.40)                               | 15.72 (14.54 – 16.99)    | 13.42 (12.35 – 14.58)      |
| 35 – 39           | 1126          | 858    | 41.22                        | 40.13  | 24.39 (23.34 – 25.48)                               | 27.31 (25.76 – 28.96)    | 21.38 (19.99 – 22.86)      |
| 40 – 44           | 1761          | 1155   | 38.77                        | 36.70  | 38.64 (37.26 – 40.07)                               | 45.42 (43.35 – 47.60)    | 31.48 (29.71 – 33.34)      |
| 45 – 49           | 2582          | 1629   | 34.07                        | 32.68  | 63.09 (61.21 – 65.02)                               | 75.79 (72.93 – 78.77)    | 49.84 (47.48 – 52.32)      |
| 50 – 54           | 3531          | 2345   | 30.27                        | 29.83  | 97.78 (95.31 – 100.31)                              | 116.66 (112.88 – 120.57) | 78.62 (75.50 – 81.87)      |
| 55 – 59           | 4313          | 3299   | 25.96                        | 26.67  | 144.63 (141.42 – 147.92)                            | 166.12 (161.24 – 171.15) | 123.71 (119.56 – 128.01)   |
| 60 – 64           | 4958          | 4453   | 20.90                        | 22.96  | 214.56 (210.27 – 218.94)                            | 237.21 (230.70 – 243.90) | 193.94 (188.32 – 199.72)   |
| 65 – 69           | 5486          | 5864   | 16.85                        | 19.78  | 309.88 (304.23 – 315.63)                            | 325.63 (317.13 – 334.36) | 296.47 (288.97 – 304.15)   |
| 70 – 74           | 5216          | 6784   | 11.86                        | 15.75  | 434.71 (427.00 – 442.56)                            | 439.87 (428.09 – 451.97) | 430.82 (420.69 – 441.20)   |
| 75 – 79           | 4092          | 6807   | 7.25                         | 11.47  | 582.02 (571.20 – 593.05)                            | 564.04 (547.02 – 581.59) | 593.39 (579.46 – 607.66)   |
| 80 – 84           | 2397          | 5262   | 3.59                         | 7.15   | 713.37 (697.57 – 729.52)                            | 668.01 (641.80 – 695.30) | 736.14 (716.51 – 756.30)   |
| 85 – 89           | 1085          | 3182   | 1.37                         | 3.59   | 860.57 (835.14 – 886.79)                            | 790.09 (744.45 – 838.53) | 887.57 (857.26 – 918.96)   |
| 90 – 94           | 329           | 1456   | 0.39                         | 1.38   | 1000.00 (959.80 – 1100.00)                          | 838.94 (753.01 – 934.67) | 1100.00 (999.86 – 1100.00) |
| 95+               | 59            | 346    | 0.11                         | 0.41   | 783.57 (710.85 – 863.72)                            | 548.94 (425.31 – 708.50) | 845.16 (760.64 – 939.08)   |
| All ages          | 38,160        | 44,614 | 372.80                       | 385.14 | 109.21 (108.47 – 109.96)                            | 102.36 (101.34 – 103.39) | 115.84 (114.77 – 116.92)   |



**Supplemental Table IV****Age- and sex-adjusted incidence rate ratio of stroke, by socioeconomic status**

| <b>Socioeconomic status</b> | Incident stroke  |
|-----------------------------|------------------|
| 1 (least deprived)          | Reference        |
| 2                           | 1.03 (1.01–1.05) |
| 3                           | 1.04 (1.01–1.06) |
| 4                           | 1.09 (1.06–1.11) |
| 5 (most deprived)           | 1.10 (1.08–1.13) |

**Supplemental Table V**

**Demographic characteristics of individuals aged 18 years or above with incident non-fatal stroke and no prior history of major adverse event (n = 68,877)**

|                                | <b>Total</b><br>n = 68,877 | <b>Men</b><br>n = 31,482 (45.7%) | <b>Women</b><br>n = 37,395 (54.3%) | <b>p-value</b> |
|--------------------------------|----------------------------|----------------------------------|------------------------------------|----------------|
| <b>Age at incident stroke</b>  | 73.3 (13.9)                | 70.3 (13.4)                      | 75.9 (13.9)                        | 0.0001         |
| <b>Type of incident stroke</b> |                            |                                  |                                    | <0.001         |
| Haemorrhagic                   | 6,682 (9.7)                | 3,229 (10.3)                     | 3,453 (9.2)                        |                |
| Ischaemic                      | 26,146 (38.0)              | 12,391 (39.4)                    | 13,755 (36.8)                      |                |
| Not otherwise specified        | 36,049 (52.3)              | 15,862 (50.4)                    | 20,187 (54.0)                      |                |
| <b>Socioeconomic status</b>    |                            |                                  |                                    | 0.282          |
| 1 (Highest SES)                | 14,779 (21.5)              | 6,840 (21.7)                     | 7,939 (21.2)                       |                |
| 2                              | 15,350 (22.3)              | 6,934 (22.0)                     | 8,416 (22.5)                       |                |
| 3                              | 14,870 (21.6)              | 6,782 (21.5)                     | 8,088 (21.6)                       |                |
| 4                              | 12,661 (18.4)              | 5,748 (18.3)                     | 6,913 (18.5)                       |                |
| 5 (Lowest SES)                 | 11,101 (16.1)              | 5,119 (16.3)                     | 5,982 (16.0)                       |                |
| Missing                        | 116 (0.2)                  | 59 (0.2)                         | 57 (0.2)                           |                |
| <b>Ethnicity</b>               |                            |                                  |                                    | <0.001         |
| Asian                          | 895 (1.3)                  | 479 (1.5)                        | 416 (1.1)                          |                |
| Black                          | 560 (0.8)                  | 278 (0.9)                        | 282 (0.8)                          |                |
| Mixed                          | 102 (0.2)                  | 57 (0.2)                         | 45 (0.1)                           |                |
| Other                          | 481 (0.7)                  | 243 (0.8)                        | 238 (0.6)                          |                |
| White                          | 61,145 (88.8)              | 28,070 (89.2)                    | 33,075 (88.5)                      |                |
| Unknown                        | 5,694 (8.3)                | 2,355 (7.5)                      | 3,339 (8.9)                        |                |
| <b>Comorbid conditions</b>     |                            |                                  |                                    |                |
| Atrial fibrillation            | 6,456 (9.4)                | 2,746 (8.7)                      | 3,710 (9.9)                        | <0.001         |
| Diabetes mellitus              | 7,979 (11.6)               | 3,968 (12.6)                     | 4,011 (10.7)                       | <0.001         |
| Dyslipidaemia                  | 6,562 (9.5)                | 2,809 (8.9)                      | 3,753 (10.0)                       | <0.001         |
| Hypertension                   | 31,861 (46.3)              | 13,388 (42.5)                    | 18,473 (49.4)                      | <0.001         |
| TIA                            | 14,073 (20.4)              | 6,257 (19.9)                     | 7,816 (20.9)                       | 0.001          |
| <b>Major adverse outcomes</b>  |                            |                                  |                                    | <0.001         |
| Coronary heart disease         | 2,420 (4.1)                | 1,311 (5.0)                      | 1,109 (3.5)                        |                |
| Haemorrhagic stroke            | 2,378 (4.1)                | 1,209 (4.6)                      | 1,169 (3.6)                        |                |
| Ischaemic stroke               | 8,842 (15.1)               | 4,254 (16.1)                     | 4,588 (14.3)                       |                |
| Stroke (not specified)         | 22,611 (38.6)              | 10,512 (39.7)                    | 12,099 (37.6)                      |                |
| Peripheral vascular disease    | 593 (1.0)                  | 334 (1.3)                        | 259 (0.8)                          |                |
| Heart failure                  | 1,482 (2.5)                | 633 (2.4)                        | 849 (2.6)                          |                |
| CVD-related death              | 9,174 (15.6)               | 3,516 (13.3)                     | 5,658 (17.6)                       |                |
| Non-CVD related death          | 11,161 (19.0)              | 4,734 (17.9)                     | 6,427 (20.0)                       |                |

TIA: transient ischaemic attack; n: total number; %: percentage/proportion; Mean age at incident stroke reported with standard deviation.

Major adverse event defined as a record of either coronary heart disease, peripheral vascular disease or heart failure.

**Supplemental Table VI****Age- and sex-adjusted incidence rate ratio of subsequent major adverse outcomes, by socioeconomic status**

| <b>Socioeconomic status</b> | <b>MACE</b>        | <b>Recurrent stroke</b> | <b>CVD-related mortality</b> | <b>All-cause mortality</b> |
|-----------------------------|--------------------|-------------------------|------------------------------|----------------------------|
| 1 (Highest SES)             | Reference          | Reference               | Reference                    | Reference                  |
| 2                           | 1.04 (1.01 – 1.07) | 1.04 (1.00 – 1.07)      | 1.10 (1.03 – 1.17)           | 1.07 (1.02 – 1.11)         |
| 3                           | 1.09 (1.06 – 1.12) | 1.07 (1.04 – 1.11)      | 1.07 (1.00 – 1.14)           | 1.05 (1.00 – 1.09)         |
| 4                           | 1.11 (1.08 – 1.14) | 1.05 (1.01 – 1.08)      | 1.21 (1.13 – 1.29)           | 1.16 (1.11 – 1.21)         |
| 5 (Lowest SES)              | 1.09 (1.06 – 1.13) | 1.00 (0.97 – 1.04)      | 1.31 (1.23 – 1.41)           | 1.31 (1.26 – 1.37)         |

**Supplemental Table VII Descriptive characteristics of patients with subsequent outcome within 30 days compared to those with outcomes after 30 days of incident stroke**

|                                       | <b>Outcome within 30 days</b><br>n=20,571 (29.9%) | <b>Outcome after 30 days</b><br>n=48,306 (70.1%) | <b>p-value</b> |
|---------------------------------------|---------------------------------------------------|--------------------------------------------------|----------------|
| <b>Age at incident stroke</b>         | 73.8 (14.0)                                       | 73.1 (13.9)                                      | 0.0001         |
| <b>Age at subsequent MACE outcome</b> | 73.6 (14.0)                                       | 76.3 (13.1)                                      | 0.0001         |
| <b>Female</b>                         | 10,995 (53.5)                                     | 26,400 (54.7)                                    | 0.004          |
| <b>Socioeconomic status</b>           |                                                   |                                                  | 0.714          |
| 1 (Highest SES)                       | 4,457 (21.7)                                      | 10,322 (21.4)                                    |                |
| 2                                     | 4,561 (22.2)                                      | 10,789 (22.3)                                    |                |
| 3                                     | 4,481 (21.8)                                      | 10,389 (21.5)                                    |                |
| 4                                     | 3,783 (18.4)                                      | 8,878 (18.4)                                     |                |
| 5 (Lowest SES)                        | 3,254 (15.8)                                      | 7,847 (16.2)                                     |                |
| Missing                               | 35 (0.2)                                          | 81 (0.2)                                         |                |
| <b>Ethnicity</b>                      |                                                   |                                                  | <0.001         |
| Asian                                 | 280 (1.4)                                         | 615 (1.3)                                        |                |
| Black                                 | 181 (0.9)                                         | 379 (0.8)                                        |                |
| Mixed                                 | 29 (0.1)                                          | 73 (0.2)                                         |                |
| Other                                 | 145 (0.7)                                         | 336 (0.7)                                        |                |
| White                                 | 17,966 (87.3)                                     | 43,179 (83.4)                                    |                |
| Unknown                               | 1,970 (9.6)                                       | 3,724 (7.7)                                      |                |
| <b>Comorbid conditions</b>            |                                                   |                                                  |                |
| Atrial fibrillation                   | 2,244 (10.9)                                      | 4,212 (8.7)                                      | <0.001         |
| Diabetes mellitus                     | 2,484 (12.1)                                      | 5,495 (11.4)                                     | 0.009          |
| Dyslipidaemia                         | 1,715 (8.3)                                       | 4,847 (10.0)                                     | <0.001         |
| Hypertension                          | 9,400 (45.70)                                     | 22,461 (46.5)                                    | 0.053          |
| TIA                                   | 1,696 (8.2)                                       | 12,377 (25.6)                                    | <0.001         |
| <b>Major adverse outcomes</b>         |                                                   |                                                  | <0.001         |
| Coronary heart disease                | 291 (1.4)                                         | 2,129 (5.6)                                      |                |
| Haemorrhagic stroke                   | 1,448 (7.0)                                       | 930 (2.44)                                       |                |
| Ischaemic stroke                      | 5,247 (25.5)                                      | 3,595 (9.4)                                      |                |
| Stroke (not specified)                | 7,240 (35.2)                                      | 15,371 (40.4)                                    |                |
| Peripheral vascular disease           | 60 (0.29)                                         | 533 (1.4)                                        |                |
| Heart failure                         | 87 (0.42)                                         | 1,395 (3.7)                                      |                |
| CVD-related death                     | 4,377 (21.3)                                      | 4,797 (12.6)                                     |                |
| Non-CVD related death                 | 1,821 (8.9)                                       | 9,340 (24.5)                                     |                |

n: total number; %: percentage/proportion; Mean age at incident stroke and mean age at subsequent MACE outcome are reported with standard deviation.

Supplemental Table VIII

**Descriptive characteristics of patients with subsequent outcome after 30 days of incident stroke by sex**

|                                       | <b>Total</b><br>n = 48,306 | <b>Men</b><br>n =21,906 (45.4%) | <b>Women</b><br>n =26,400 (54.7%) | <b>p-value</b> |
|---------------------------------------|----------------------------|---------------------------------|-----------------------------------|----------------|
| <b>Age at incident stroke</b>         | 73.1 (13.9)                | 70.3 (13.4)                     | 75.5 (13.9)                       | 0.0001         |
| <b>Age at subsequent MACE outcome</b> | 76.3 (13.1)                | 73.3 (12.8)                     | 78.8 (12.9)                       | 0.0001         |
| <b>Socioeconomic status</b>           |                            |                                 |                                   | 0.646          |
| 1 (Highest SES)                       | 10,322 (21.4)              | 4,730 (21.6)                    | 5,957 (22.6)                      |                |
| 2                                     | 10,789 (22.3)              | 4,832 (22.1)                    | 5,957 (22.6)                      |                |
| 3                                     | 10,389 (21.5)              | 4,691 (21.4)                    | 5,698 (21.6)                      |                |
| 4                                     | 8,878 (18.4)               | 4,018 (18.3)                    | 4,860 (18.4)                      |                |
| 5 (Lowest SES)                        | 7,847 (16.2)               | 3,597 (16.4)                    | 4,250 (16.1)                      |                |
| Missing                               | 81 (0.2)                   | 38 (0.2)                        | 43 (0.2)                          |                |
| <b>Ethnicity</b>                      |                            |                                 |                                   | <0.001         |
| Asian                                 | 615 (1.3)                  | 327 (1.5)                       | 288 (1.1)                         |                |
| Black                                 | 379 (0.8)                  | 183 (0.8)                       | 196 (0.7)                         |                |
| Mixed                                 | 73 (0.2)                   | 38 (0.2)                        | 35 (0.1)                          |                |
| Other                                 | 336 (0.7)                  | 163 (0.7)                       | 173 (0.7)                         |                |
| White                                 | 43,179 (89.4)              | 19,644 (89.7)                   | 23,535 (89.2)                     |                |
| Unknown                               | 3,724 (7.7)                | 1,551 (7.1)                     | 2,173 (8.2)                       |                |
| <b>Comorbid conditions</b>            |                            |                                 |                                   |                |
| Atrial fibrillation                   | 4,212 (8.7)                | 1,839 (8.4)                     | 2,373 (9.0)                       | 0.021          |
| Diabetes mellitus                     | 5,495 (11.4)               | 2,739 (12.5)                    | 2,756 (10.4)                      | <0.001         |
| Dyslipidaemia                         | 4,847 (10.0)               | 2,083 (9.5)                     | 2,764 (10.5)                      | <0.001         |
| Hypertension                          | 22,461 (46.5)              | 9,402 (42.9)                    | 13,059 (49.5)                     | <0.001         |
| TIA                                   | 12,377 (25.6)              | 5,497 (25.1)                    | 6,880 (26.1)                      | 0.015          |
| <b>Outcomes</b>                       |                            |                                 |                                   | <0.001         |
| Coronary heart disease                | 2,129 (4.4)                | 1,149 (5.2)                     | 980 (3.7)                         |                |
| Haemorrhagic stroke                   | 930 (1.9)                  | 463 (2.1)                       | 467 (1.8)                         |                |
| Ischaemic stroke                      | 3,595 (7.4)                | 1,641 (7.5)                     | 1,954 (7.4)                       |                |
| Stroke (not specified)                | 15,371 (31.8)              | 6,944 (31.7)                    | 8,427 (31.9)                      |                |
| Peripheral vascular disease           | 533 (1.1)                  | 301 (1.4)                       | 232 (0.9)                         |                |
| Heart failure                         | 1,395 (2.9)                | 593 (2.7)                       | 802 (3.0)                         |                |
| CVD-related death                     | 4,797 (9.9)                | 1,882 (8.6)                     | 2,915 (11.0)                      |                |
| Non-CVD related death                 | 9,340 (19.3)               | 3,954 (18.0)                    | 5,386 (20.4)                      |                |

n: total number; %: percentage/proportion; Mean age at incident stroke and mean age at subsequent MACE outcome reported with standard deviation.

Supplemental Table IX

**Incidence of subsequent major adverse outcomes for patient with subsequent major adverse event after 30 days of index stroke (n=48,306)**

|                                          | Follow-up time     | Cases  | Person-years* | Incidence rate<br>(per 100 person-years) | Incidence rate ratio | p-value |
|------------------------------------------|--------------------|--------|---------------|------------------------------------------|----------------------|---------|
| <b>MACE (All)</b>                        | 1.09 (0.31 – 2.91) | 28,750 | 1,200         | 23.14 (22.87 – 23.41)                    |                      | <0.0001 |
| Men                                      | 1.09 (0.33 – 2.98) | 12,973 | 575.95        | 22.53 (22.14 – 22.92)                    | Reference            |         |
| Women                                    | 1.09 (0.31 – 2.85) | 15,777 | 666.62        | 23.67 (23.30 – 24.04)                    | 1.05 (1.03 – 1.08)   |         |
| <b>Recurrent stroke (All)</b>            | 1.00 (0.28 – 2.29) | 19,896 | 1,300         | 15.43 (15.22 – 15.65)                    |                      | <0.0001 |
| Men                                      | 0.99 (0.28 – 2.32) | 9,048  | 611.13        | 14.81 (14.50 – 15.11)                    | Reference            |         |
| Women                                    | 1.02 (0.29 – 2.28) | 10,848 | 678.38        | 15.99 (15.69 – 16.30)                    | 1.08 (1.05 – 1.11)   |         |
| <b>Cardiovascular mortality (All)</b>    | 1.33 (0.25 – 3.85) | 4,797  | 2,100         | 2.34 (2.27 – 2.41)                       |                      | <0.0001 |
| Men                                      | 1.55 (0.33 – 4.29) | 1,882  | 971.16        | 1.94 (1.85 – 2.03)                       | Reference            |         |
| Women                                    | 1.16 (0.23 – 3.62) | 2,915  | 1,100         | 2.70 (2.60 – 2.80)                       | 1.39 (1.31 – 1.48)   |         |
| <b>All-cause mortality (All)</b>         | 1.83 (0.44 – 4.66) | 14,137 | 2,100         | 6.58 (6.47 – 6.69)                       |                      | <0.0001 |
| Men                                      | 1.90 (0.49 – 4.78) | 5,836  | 1,000         | 5.78 (5.64 – 5.93)                       | Reference            |         |
| Women                                    | 1.83 (0.44 – 4.66) | 8,301  | 1,100         | 7.28 (7.12 – 7.44)                       | 1.26 (1.22 – 1.30)   |         |
| <b>Coronary heart disease (All)</b>      | 2.18 (0.82 – 4.63) | 2,129  | 2,000         | 1.09 (1.05 – 1.14)                       |                      | <0.0001 |
| Men                                      | 2.17 (0.78 – 4.68) | 1,149  | 921.94        | 1.25 (1.18 – 1.32)                       | Reference            |         |
| Women                                    | 2.18 (0.86 – 4.41) | 980    | 1000          | 0.95 (0.89 – 1.01)                       | 0.76 (0.70 – 0.83)   |         |
| <b>Peripheral arterial disease (All)</b> | 1.88 (0.82 – 4.30) | 533    | 2,000         | 0.27 (0.25 – 0.29)                       |                      | <0.0001 |
| Men                                      | 1.99 (0.81 – 4.21) | 301    | 945.69        | 0.32 (0.28 – 0.36)                       | Reference            |         |
| Women                                    | 1.80 (0.84 – 4.38) | 232    | 1,000         | 0.22 (0.19 – 0.25)                       | 0.70 (0.58 – 0.83)   |         |
| <b>Heart failure (All)</b>               | 1.94 (0.69 – 4.68) | 1,395  | 2,000         | 0.70 (0.67 – 0.74)                       |                      | 0.0001  |
| Men                                      | 1.91 (0.70 – 4.52) | 593    | 946.69        | 0.63 (0.58 – 0.68)                       | Reference            |         |
| Women                                    | 1.95 (0.69 – 4.90) | 802    | 1,000         | 0.77 (0.72 – 0.82)                       | 1.23 (1.10 – 1.37)   |         |

\* 100 person-years at risk; All – both men and women; Follow-up time – median follow-up time in years reported with interquartile range

**Supplemental Table X****Age- and sex-adjusted incidence rate ratio of subsequent major adverse outcomes, by socioeconomic status for patient with subsequent major adverse event after 30 days of index stroke (n=48,306)**

| <b>Socioeconomic status</b> | <b>MACE</b>        | <b>Recurrent stroke</b> | <b>CVD-related mortality</b> | <b>All-cause mortality</b> |
|-----------------------------|--------------------|-------------------------|------------------------------|----------------------------|
| 1 (Highest SES)             | Reference          | Reference               | Reference                    | Reference                  |
| 2                           | 1.06 (1.02 – 1.10) | 1.06 (1.01 – 1.04)      | 1.06 (0.97 – 1.15)           | 1.03 (0.98 – 1.08)         |
| 3                           | 1.10 (1.06 – 1.14) | 1.08 (1.03 – 1.13)      | 1.07 (0.98 – 1.17)           | 1.04 (0.99 – 1.09)         |
| 4                           | 1.13 (1.09 – 1.17) | 1.08 (1.03 – 1.12)      | 1.15 (1.05 – 1.26)           | 1.12 (1.07 – 1.18)         |
| 5 (Lowest SES)              | 1.13 (1.09 – 1.18) | 1.03 (0.99 – 1.08)      | 1.32 (1.21 – 1.45)           | 1.30 (1.23 – 1.37)         |
